# Supplementary material
Source: MDPI journal article supplement (https://www.mdpi.com/2073-4344/13/1/119)
Supplement: s1 [file s1]

*Supporting information for*

# Development of Quinary Layered Double Hydroxide-derived High-entropy Oxides for Toluene Catalytic Removal

Tianshan Xue <sup>1,\*</sup>, Yiping Wang <sup>2</sup>, Li Yang <sup>1</sup>, Zhe Li <sup>3</sup>, Yanshan Gao <sup>3</sup> and Qiang Wang <sup>3</sup>

<sup>1</sup> Institute of Atmospheric Environment, Chinese Research Academy of Environmental Sciences,  
Beijing 100012, China

<sup>2</sup> State Key Laboratory of Chemical Resource Engineering, Beijing University of Chemical Technology,  
Beijing 100029, China

<sup>3</sup> College of Environmental Science and Engineering, Beijing Forestry University, Beijing 100083, China

\* Correspondence: author: lynnleslie@foxmail.com

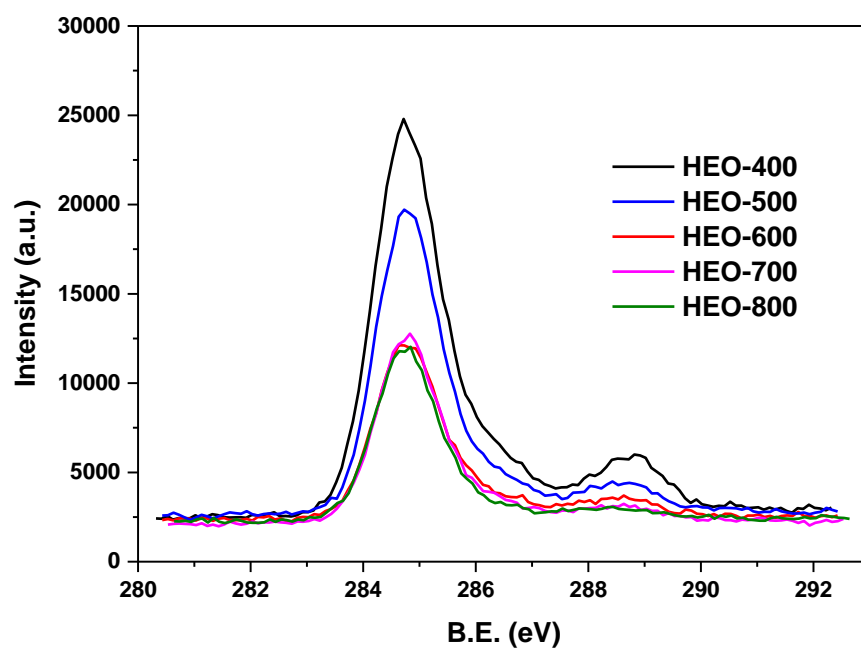

Figure S1. C 1s XPS spectra of HEOs.

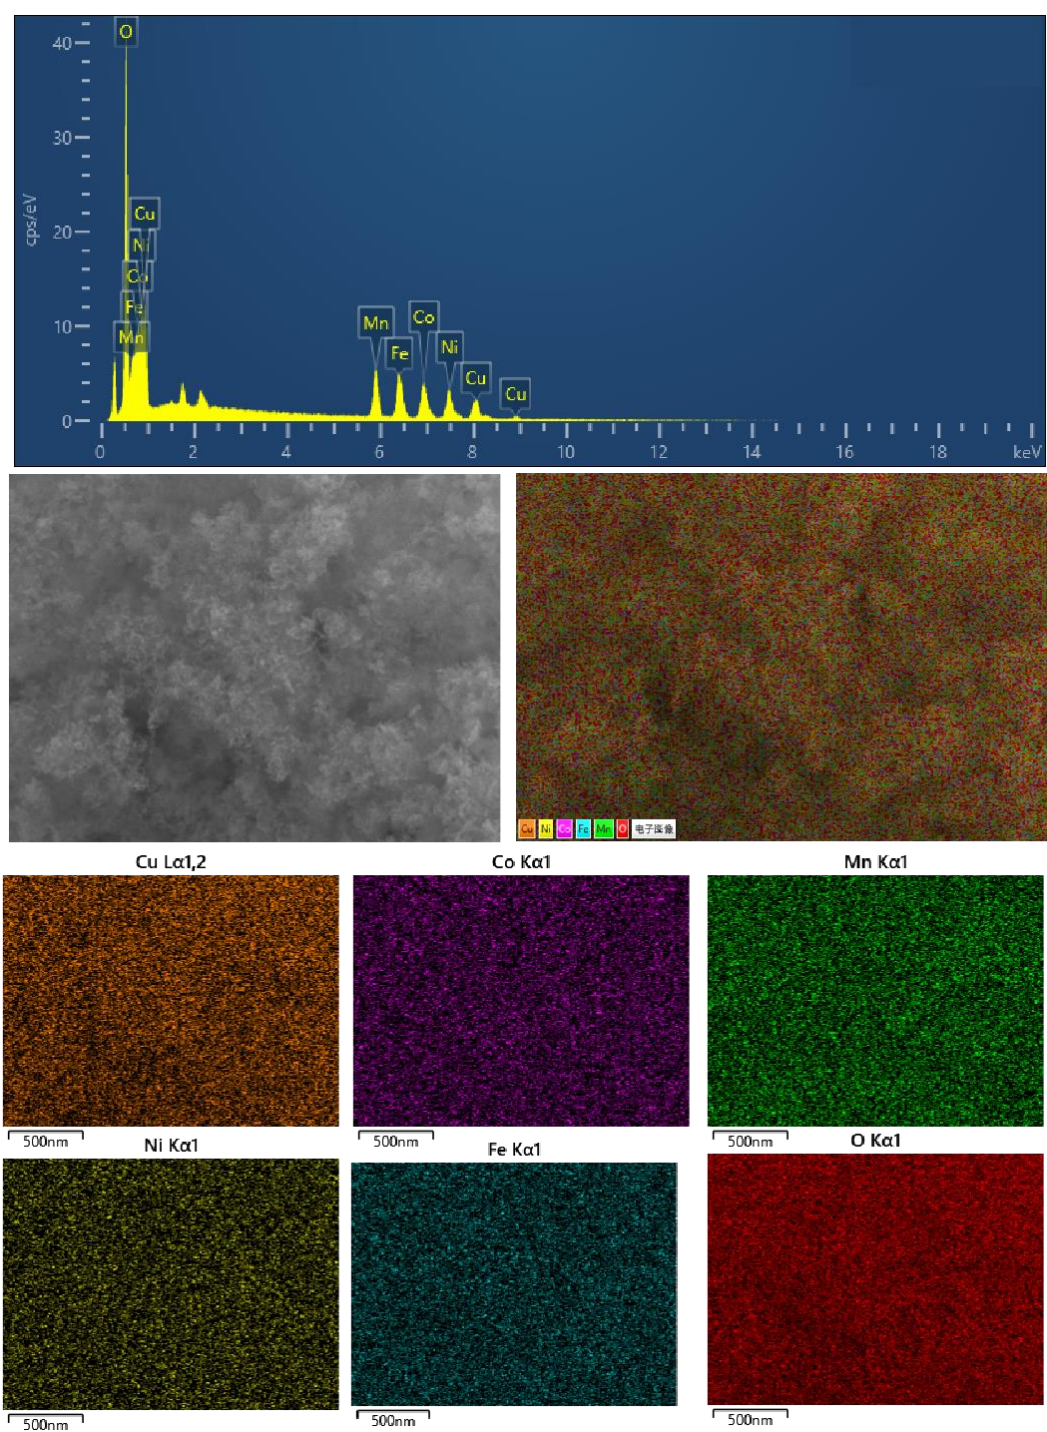

**Figure S2.** EDS spectrum and elements mapping of HEO-600.

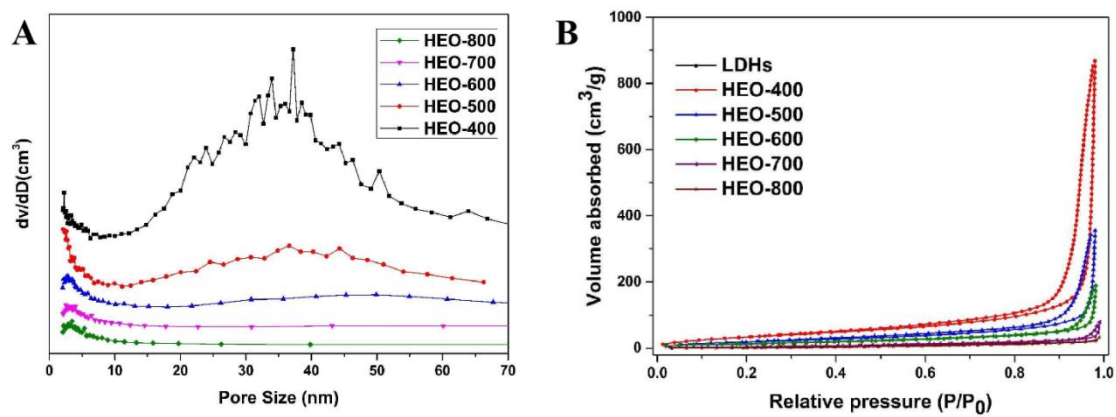

**Figure S3.** (A) N<sub>2</sub> adsorption/desorption isotherms and (B) BJH pore size distribution of HEOs.

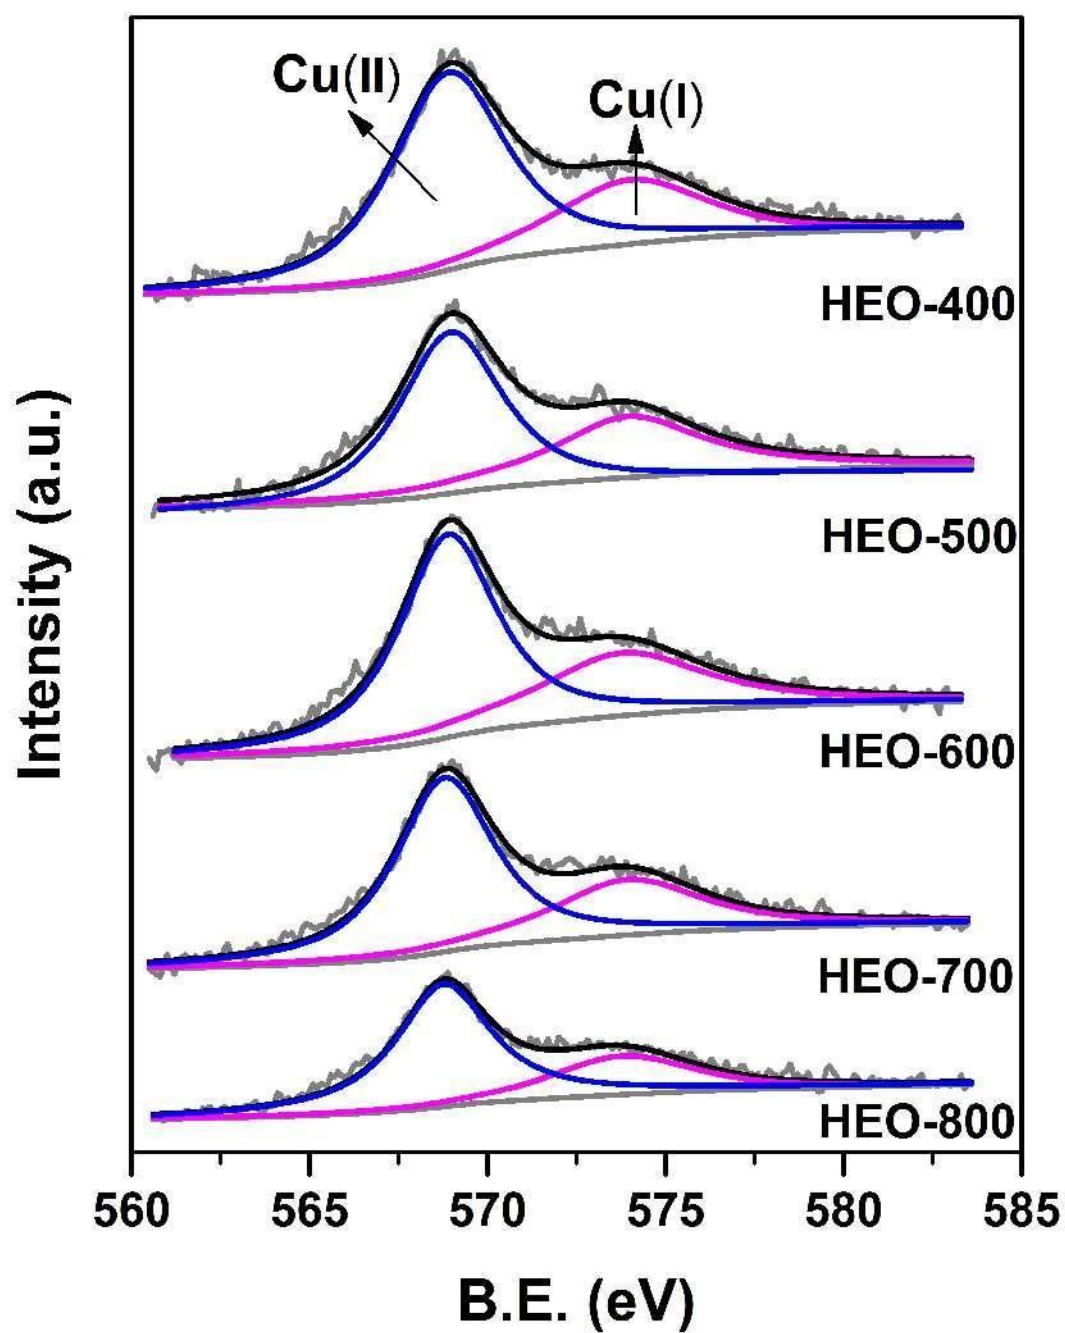

Figure S4. Cu AES spectra of HEOs.

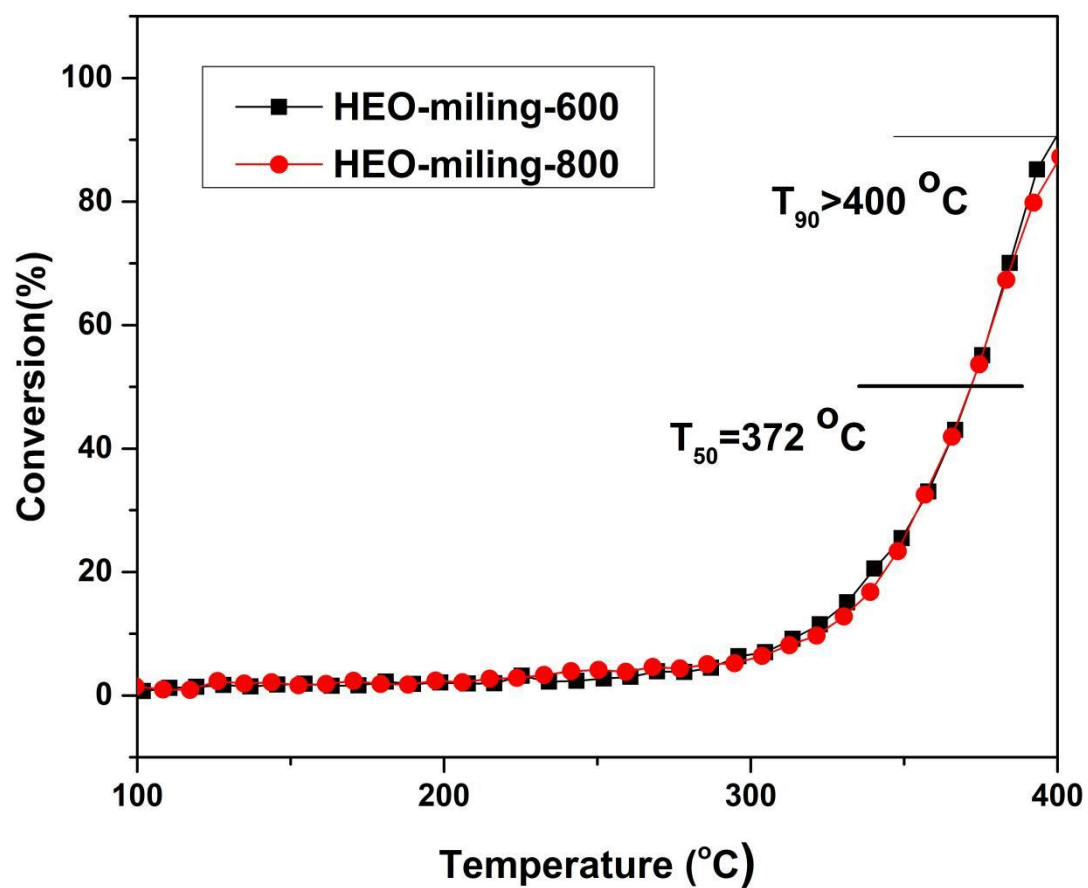

Figure S5. Catalytic performance of HEO-miling-600 and HEO-miling-800.

Table S1 The obtained atomic percentage from EDS spectrum

| Element | Line | Weight% | Atom%  |
|---------|------|---------|--------|
| O       | K    | 28.68   | 59.48  |
| Mn      | K    | 13.45   | 8.12   |
| Fe      | K    | 13.63   | 8.10   |
| Co      | K    | 14.48   | 8.15   |
| Ni      | K    | 14.24   | 8.05   |
| Cu      | L    | 15.52   | 8.10   |
| Total   |      | 100.00  | 100.00 |
